# Supplementary material for: System Delay in Breast Cancer Diagnosis in Gaza Strip, Palestine
Source: J Oncol. 2019 Dec 11;2019:5690938. doi: 10.1155/2019/5690938 (PMC6927013; doi:10.1155/2019/5690938)
Supplement: Supplementary Materials — The file is about the interviewed questionnaires with the patients. The other one is the in-depth interviews questions with the specialists. Supplementary file 1: the questionnaire sheet; supplementary file 2: the abstraction sheet. [file 5690938.f1.zip]

Archive with 2 entries (2 files):
- 5690938.f1/abstraction sheet.docx
- 5690938.f1/questionnaire.docx
